# Supplementary material for: Different and Unequal: A Qualitative Evaluation of Salient Factors Influencing Energy Intake in Adults with Overweight and Obesity
Source: PubMed Central journal article supplement (PMC6627170; doi:10.3390/nu11061365), 2019-06-18
Supplement: nutrients-11-01365-s001.pdf [file nutrients-11-01365-s001.pdf]

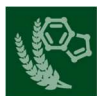

**Different and unequal: a qualitative evaluation of salient factors influencing energy intake in adults with overweight and obesity**

Dao et al

**Supplementary Tables.**

**Table 1.** Preplanned questions for informant interviews and focus groups.

| <b>Domain</b>                                                    | <b>Question</b>                                                                                                                                                                                                                                                      |
|------------------------------------------------------------------|----------------------------------------------------------------------------------------------------------------------------------------------------------------------------------------------------------------------------------------------------------------------|
| <b>1: Ice Breaker</b>                                            | For informant interviews only: choose your favorite 3 foods from this picture ( <b>Figure 1</b> ). When do you like to eat these foods?                                                                                                                              |
| <b>2: Reasons for eating</b>                                     | Some people say that what you eat determines who you are; others just use food as sustenance. How does food fit into your life?                                                                                                                                      |
| <b>3: Attitudes toward body image, nutrition, health</b>         | What determines your health? What do you have to do to be in good health? In your opinion, does food influence health? How? What are your sources for health or nutrition advice?                                                                                    |
|                                                                  | Do you pay attention to your weight? In your opinion, what are the most effective strategies to lose and maintain weight?                                                                                                                                            |
|                                                                  | If you were not satisfied with your current weight, why would you want to change your weight? Would it be easy to change your body weight if you wanted to?                                                                                                          |
|                                                                  | Have you been on weight loss diets in the past? How often and for how long? How did it go?                                                                                                                                                                           |
| <b>4: Insularity, fatalism and other general cultural traits</b> | Would anyone make remarks if your weight changed? If yes, who would?                                                                                                                                                                                                 |
|                                                                  | Nutritionists sometimes talk about “food culture” (how people make choices about what to eat based on their history, identity, people they eat with). What does this idea of “food culture” mean to you?                                                             |
|                                                                  | Now we’re going to talk about food culture when you were a child. Do you think about food culture the same way you did when you were younger? What are some examples? Give some examples about what you ate as a child, and what has changed?                        |
|                                                                  | How do you feel about new foods, cuisines and ways to prepare food that you have not been familiar with? On the other hand, how do you feel about foods produced locally where you live or where you are from?                                                       |
| <b>5: Meal patterns</b>                                          | What is your definition of a meal? What does not qualify as a meal?<br>On a typical day, how many meals and snacks do you eat per day?                                                                                                                               |
| <b>6: Attitudes to hunger and restraint</b>                      | When you feel hungry and it is not time to eat, what do you do?                                                                                                                                                                                                      |
|                                                                  | When food is available even if it is not time to eat, what do you do?<br>How full do you usually feel after you eat? Why do usually stop eating?                                                                                                                     |
| <b>7: External pressures to overeat / not eat</b>                | When you attend important life events or celebrations (for example, birthdays, weddings, national holiday celebrations), is there food provided? How do you usually eat at these events? How much food is provided? Do you eat? How much do you eat? Why do you eat? |
|                                                                  | Do you eat differently when you are alone than when you eat with others?                                                                                                                                                                                             |
|                                                                  | Do you feel comfortable eating alone in a public place? Additional probe: How do you feel about eating in front of the TV at home? How do you feel?                                                                                                                  |
|                                                                  | When you eat with others, are there things / behaviors that you pay attention to? Do you compare your behaviors with others? Can you give some examples?                                                                                                             |

**Table 2.** Individual age range and BMI category.

|                                             | <b>Participant</b> | <b>Age (y)</b> | <b>BMI category</b> |
|---------------------------------------------|--------------------|----------------|---------------------|
| Interviews: Healthy BMI (N=5)               | L1                 | 18-45          | Healthy             |
|                                             | L2                 | 45-65          | Healthy             |
|                                             | L3                 | >65            | Healthy             |
|                                             | L4                 | >65            | Healthy             |
|                                             | L5                 | 18-45          | Healthy             |
| Interviews: Overweight / Obese BMI (N=5)    | OW6                | 45-65          | Overweight          |
|                                             | OB7                | >65            | Obese               |
|                                             | OB8                | >65            | Obese               |
|                                             | OB9                | 18-45          | Obese               |
|                                             | OB10               | 45-65          | Obese               |
| Focus group 1:<br>Overweight BMI (N=7)      | FG1OW-1            | >65            | Overweight          |
|                                             | FG1OW-2            | >65            | Overweight          |
|                                             | FG1OW-3            | 45-65          | Overweight          |
|                                             | FG1OW-4            | >65            | Overweight          |
|                                             | FG1OW-5            | >65            | Overweight          |
|                                             | FG1OW-6            | 45-65          | Overweight          |
|                                             | FG1OW-7            | 18-45          | Overweight          |
| Focus group 2: Overweight / Obese BMI (N=3) | FG2OWOB-1          | 45-65          | Obese               |
|                                             | FG2OWOB-2          | 18-45          | Overweight          |
|                                             | FG2OWOB-3          | 18-45          | Obese               |
| Focus group 3: Overweight / Obese BMI (N=4) | FG3OWOB-1          | 18-45          | Obese               |
|                                             | FG3OWOB-2          | >65            | Overweight          |
|                                             | FG3OWOB-3          | >65            | Overweight          |
|                                             | FG3OWOB-4          | 45-65          | Obese               |
